# Supplementary material for: Arid1b haploinsufficient mice reveal neuropsychiatric phenotypes and reversible causes of growth impairment
Source: eLife. 2017 Jul 11;6:e25730. doi: 10.7554/eLife.25730 (PMC5515576; doi:10.7554/eLife.25730)
Supplement: Figure 1—figure supplement 1—source data 1. — DOI: http://dx.doi.org/10.7554/eLife.25730.006 [file elife-25730-fig1-figsupp1-data1.xlsx]

## Sheet: B
K+	mmol/L		CREA	mg/dL		BUN	mg/dL
WT	Het		WT	Het		WT	Het
8.3	7.1		0.17	0.21		21	29
7.7	7.4		0.23	0.16		23	27
8.2	6.6		0.15	0.18		22	35
7.4	4.8		0.2	0.19		23	31
8.2	7.6		0.19	0.19		23	26
6.9	5.5		0.18	0.17		20	28
7	7.3		0.19	0.19		20	21
6.9	8		0.19	0.21		16	24
5.7	9.6		0.2	0.15		19	23
	6.7			0.17			24

## Sheet: C
AST (U/L)			ALT (U/L)			ALB (U/dL)
WT	Het		WT	Het		WT	Het
50	86		36	45		2.8	2.6
50	73		33	32		2.5	3
80	78		32	36		2.9	2.9
75	59		34	38		3.2	2.8
61	75		33	40		2.8	2.9
64	59		30	36		3	3
70	62		32	38		3	2.6
63	92		40	29		3	3.2
67	81		43	35		2.9	2.9
	80			47			3.1

## Sheet: D
	WT										Arid1b-Het
WBC	4.14	4.8	5.2	3.12	2.86	5.54	5.6	3.74	4.16		7.96	4.78	4.4	2.24	5.34	2.52	6.16	4.06	6.92	5.68
RBC	9.05	8.61	9.3	9.67	8.79	8.48	9.1	8.71	8.75		9.8	8.67	8.66	8.75	7.65	9.59	9.34	9.18	9.37	9.43
PLT	665	698	799	922	842	844	846	928	862		818	1008	834	940	487	941	728	982	658	766
