# Supplementary material for: Arid1b haploinsufficient mice reveal neuropsychiatric phenotypes and reversible causes of growth impairment
Source: eLife. 2017 Jul 11;6:e25730. doi: 10.7554/eLife.25730 (PMC5515576; doi:10.7554/eLife.25730)
Supplement: Figure 1—figure supplement 2—source data 1. — DOI: http://dx.doi.org/10.7554/eLife.25730.008 [file elife-25730-fig1-figsupp2-data1.xlsx]

## Sheet: A
WT	Arid1b+/-
4	12
4	2
8	3
10	3
10	2
7	7
6	6
8	3
10	0
9

## Sheet: C
P4 WT	P4 Het
50	636
2	828
144	617
824	929
46	279
742	378
787	294
352	391
735	434
927	24
586	167
394	152
220	769
252	783
69	166
194	45
19	66
231	25
288	129
85	60
533	64
323	323
60	109
480	582
2	368
41	753
226	653
176	252
3	2
78	180
326	121
78	25
599	379
605
992
277
708
916
994
686
1018
811
567
248
534
528
82
100
289
120
28
75
7
78
208
196
400
7
157
5
71
72
26

## Sheet: D
left graph	WT (n=20)																				Arid1b Het (n=20)
5	157	128	225	262	219	133	213	171	223	108	153	168	128	136	192	116	129	175	214	161	141	179	167	184	195	102	168	134	123	132	163	194	106	148	225	167	191	91	218	173
10	145	121	231	191	240	89	211	156	196	145	175	177	146	123	190	116	134	172	223	156	136	143	144	150	172	103	148	111	125	136	157	166	143	99	203	188	169	117	197	179
15	175	94	210	164	201	140	191	131	197	113	143	128	145	113	180	97	120	117	178	110	128	130	118	133	99	76	85	86	114	122	138	138	131	104	167	129	137	107	188	162
20	109	96	173	173	189	111	169	151	170	116	150	98	121	132	156	82	113	90	191	125	97	125	125	104	144	96	98	92	83	62	112	130	101	75	164	134	187	107	166	168
25	127	102	152	146	170	134	174	129	170	65	126	85	117	81	164	64	93	118	123	169	98	112	111	84	140	79	103	64	82	66	93	105	107	60	190	115	80	108	193	156
30	133	40	192	118	143	132	180	119	149	120	165	105	115	126	154	77	53	82	155	125	65	87	59	56	77	57	91	51	54	52	144	119	103	60	184	142	131	92	175	167
35	101	70	110	103	203	86	153	109	187	114	131	84	129	123	163	77	31	96	125	78	91	102	97	111	118	81	71	44	35	74	109	99	61	32	228	111	114	90	180	124
40	86	23	163	95	140	99	168	116	147	41	150	89	11	114	115	65	74	48	57	117	52	51	116	58	122	42	66	78	51	81	96	103	56	78	106	88	108	116	107	102
45	72	81	129	40	129	100	145	93	135	92	112	59	124	53	68	69	67	56	91	73	102	103	110	93	98	57	62	52	45	66	68	84	48	74	171	126	115	106	74	103
50	53	25	116	85	113	90	93	92	154	57	110	58	100	83	126	61	18	90	87	61	85	55	106	44	109	60	113	71	66	73	114	63	55	40	163	121	27	106	89	111
55	45	66	108	65	98	77	103	100	114	18	126	59	87	107	78	42	72	82	18	83	38	94	86	45	82	44	61	45	71	39	49	87	70	67	136	96	81	109	63	41
60	90	45	85	77	124	23	49	79	59	77	25	54	80	86	113	71	5	41	69	100	19	55	72	77	70	13	70	58	64	34	87	91	27	60	124	46	45	65	18	59
65	106	26	99	8	115	90	75	93	97	88	68	48	66	61	84	57	51	40	17	112	92	71	40	49	61	21	64	23	45	25	52	85	48	46	103	27	81	45	16	82
70	21	66	51	40	115	90	95	96	110	32	79	61	70	36	90	43	23	95	27	85	43	66	52	23	79	56	80	47	23	59	79	31	62	30	148	91	108	131	70	42
75	0	46	22	12	51	66	63	24	81	11	96	47	4	54	41	49	76	65	36	86	25	82	58	0	67	0	86	26	41	60	90	68	48	45	107	59	81	87	119	106
80	35	16	22	17	84	61	28	66	133	43	38	41	41	77	3	33	67	57	0	51	0	58	49	1	28	20	71	49	59	50	32	56	40	32	47	60	58	117	46	87
85	29	4	93	4	55	2	81	105	78	0	56	68	84	25	11	27	0	24	2	50	0	49	38	0	42	0	42	96	50	49	60	33	48	8	36	114	92	24	24	110
90	0	4	0	10	16	0	0	107	23	0	96	5	89	90	26	54	46	0	49	49	0	41	18	0	34	0	37	51	15	49	84	90	59	48	41	42	28	75	0	24
95	0	8	4	0	10	74	0	99	79	0	99	14	95	55	11	47	4	0	0	82	4	35	4	0	60	0	25	57	20	60	1	97	22	0	23	24	75	116	0	1
100	0	19	0	4	12	72	0	91	57	76	50	0	67	27	0	10	10	0	0	48	0	0	40	21	19	0	23	50	33	54	50	60	0	0	0	80	98	47	0	9
105	0	0	0	6	14	81	0	33	31	110	43	0	25	70	0	8	6	1	0	59	0	0	0	0	0	0	15	64	6	42	69	35	0	0	0	78	76	30	0	0
110	0	1	3	2	0	67	0	28	9	100	84	0	55	60	3	2	2	0	0	54	0	1	0	0	0	0	4	19	0	38	0	4	0	0	0	54	108	9	0	1
115	0	0	0	0	0	50	0	28	0	37	22	0	19	34	0	0	0	24	0	38	0	0	0	0	0	0	3	33	0	47	66	0	2	0	0	18	42	0	0	0
120	0	64	0	2	0	4	52	64	0	39	1	0	50	14	0	2	0	36	0	13	0	0	0	0	0	0	1	2	0	59	38	3	0	0	0	0	105	0	0	0
right graph
WT	Arid1b +/-
1484	1216
1145	1639
2188	1610
1624	1233
2441	1816
1871	907
2243	1587
2280	1403
2599	1205
1602	1529
2298	1951
1448	1941
1968	1337
1880	1106
1968	2566
1269	2110
1194	2337
1509	1895
1662	1943
2085	2007

## Sheet: E
Left graph
Target (WT)	Others (WT)	Target (Het)	Others (Het)
18.38	27.11	30.08	23.3
20.33	26.55	66.02	11.33
40.95	19.68	42.06	19.31
47.63	17.46	56.27	14.58
41.23	19.59	50.42	16.53
21.45	26.18	58.77	13.74
42.9	19.03	26.18	24.6
32.59	22.47	21.17	26.27
33.43	22.19	43.45	18.85
35.65	21.45	55.15	14.86
39.28	20.24	54.32	15.22
44.01	18.66	20.06	26.65
61	13	35.65	21.45
26.46	24.51	33.7	22.1
47.91	17.36	34.26	21.91
31.48	22.84	19.78	26.74
15.6	28.13	28.69	23.77
23.4	25.53	29.53	23.49
23.12	25.62	24.23	25.25
19.22	26.92	60.44	13.18
Right graph
WT	Het
2	4
2	4
3	1
1	5
2	4
1	2
5	1
2	1
1	3
2	4
4	3
4	0
4	2
1	0
2	8
2	0
2	0
1	0
0	1
1	7

## Sheet: F
WT											Arid1b +/-
82.7	60.63	79.66	48.42	56.87	70.34	46.92	70.04	60.72	58.89		71.38	80.23	96.29	77.1	83.11	53.53	65.29	40.72	75	68.48	64.43

## Sheet: G
	WT											Arid1b +/-
Before tone	48.41	34.17	48.67	17.72	31.39	36.67	29.5	48.28	16.94	34.04		49.33	34.96	59.81	30.19	62.28	29.87	46.81	31.91	44.48	51.46	33.09
After tone	76.52	78.61	78.22	62.56	74.24	75.13	78.98	78.41	51.96	70.48		75.2	75.63	97	75.24	97.2	76.74	83.65	58.85	79.65	63.28	72.46

## Sheet: H
	WT											Arid1b-Het +/-
Flinch	0.1	0.1	0.05	0.1	0.15	0.1	0.05	0.1	0.1	0.2		0.15	0.1	0.1	0.1	0.1	0.05	0.1	0.1	0.15	0.1	0.1
Vocalize	0.25	0.15	0.2	0.2	0.35	0.2	0.2	0.15	0.35	0.2		0.4	0.25	0.3	0.2	0.1	0.2	0.15	0.25	0.2	0.15	0.2
Jump	0.65	0.5	0.2	0.25	0.25	0.3	0.45	0.5	0.65	0.45		0.6	0.45	0.45	0.7	0.4	0.5	0.45	0.45	0.5	0.45	0.25
