# Supplementary material for: Arid1b haploinsufficient mice reveal neuropsychiatric phenotypes and reversible causes of growth impairment
Source: eLife. 2017 Jul 11;6:e25730. doi: 10.7554/eLife.25730 (PMC5515576; doi:10.7554/eLife.25730)
Supplement: Figure 1—source data 1. — DOI: http://dx.doi.org/10.7554/eLife.25730.004 [file elife-25730-fig1-data1.xlsx]

## Sheet: Fig.1B
	WT	WT	WT	WT	WT	Arid1b het	Arid1b het	Arid1b het	Arid1b het	Arid1b het
Liver	95.1839	109.62	103.39	84.5813	107.224	73.7391	63.1365	72.8405	68.0484	60.0216
Brain	95.1039	93.5961	96.6791	114.621		73.1899	72.4735	68.984	66.6138	65.9676
Pituitary Gland	127.735	106.67	96.1365	78.0871	90.01	58.3642	64.984	77.817	64.984	54.6448
Dentate gyrus	119.193	113.498	60.0595	113.344	93.905	72.9587	53.6981	57.2016	64.1876	54.9356
Hypothalamus	123.088	82.1253	41.425	97.0904	156.272	54.1891	66.1495	56.6887	54.9663	35.1081

## Sheet: Fig.1F
WT	Arid1b+/-
102	71
109	46
97	55
66	61
71	83
70	68
88	68
80	60
74
93

## Sheet: fig.1G
WT	Arid1b+/-
7.9	22.49
31.07	29.28
6.04	31.99
17.8	19.4
11.75	28.52
11.46	23.53
1.92	7.93
17.84	19.79
23.72	25.18
11.94

## Sheet: Fig.1H
P4 WT	P4 Arid1b+/-
0.01532	0.03363
0.0085	0.03502
0.03027	0.03575
0.0351	0.03568
0.01271	0.04082
0.03934	0.04346
0.02951	0.05857
0.03885	0.05432
0.02632	0.04824
0.03363	0.05991
0.02461	0.06476
0.03269	0.05226
0.05253	0.03594
0.03155	0.03054
0.02459	0.06565
0.04308	0.02566
0.01936	0.03397
0.03769	0.06652
0.0314	0.04162
0.05589	0.02956
0.02413	0.02914
0.01975	0.06257
0.0181	0.03112
0.01648	0.06076
0.0075	0.01984
0.02263	0.03662
0.02862	0.04106
0.04161	0.0404
0.02033	0.0365
0.03651	0.03518
0.03859	0.08079
0.02397	0.05224
0.02651	0.06455
0.01326
0.03457
0.01983
0.0305
0.03027
0.03768
0.02624
0.03493
0.02723
0.03019
0.03948
0.04723
0.03168
0.03809
0.02662
0.04524
0.0201
0.02175
0.01653
0.02642
0.0342
0.04592
0.02885
0.05147
0.02357
0.03324
0.0098
0.02756
0.02863
0.0405

## Sheet: Fig.1I
P4 WT	P4 Arid1b+/-
79.898	72.1809
79.6	70.6086
76.9027	69.6787
74.8002	67.216
70.4173	68.7655
68.119	67.851
76.118	69.6329
66.4579	66.1271
71.6293	65.226
76.2365	64.4166
75.3107	66.6395
73.5791	71.6973
74.9513	74.049
74.5346	71.7137
67.1014	58.1469
87.3317	65.5422
70.7736	61.5106
70.2017	70.2666
66.7498	78.9294
63.2397	70.3135
70.5876	63.725
74.1804	65.5325
74.6233	64.6009
78.131	63.0316
54.5	66.2741
66.6341	69.2602
67.2424	67.2344
64.5784	69.9698
81.3666	68.3
75.5115	65.0488
64.9533	63.5975
69.6311	73.316
75.1995	62.4854
65.3535
71.4224
64.4851
69.0341
67.241
75.3911
73.0275
72.2114
68.4233
68.1074
73.6419
67.605
65.5628
73.4987
74.1171
66.5401
73.06
67.4178
70.9133
70.9571
67.774
76.5305
66.8489
67.2258
73.1
65.9128
61.94
76.5857
66.9805
79.4307

## Sheet: Fig.1J
	WT	WT	WT	WT	WT	WT	WT	WT	WT	WT	WT	WT	WT	WT	WT	WT	WT	WT	WT	WT	Arid1b Het	Arid1b Het	Arid1b Het	Arid1b Het	Arid1b Het	Arid1b Het	Arid1b Het	Arid1b Het	Arid1b Het	Arid1b Het	Arid1b Het	Arid1b Het	Arid1b Het	Arid1b Het	Arid1b Het	Arid1b Het	Arid1b Het	Arid1b Het	Arid1b Het	Arid1b Het
Center	6.34	8.17	17.18	14.35	18.18	22.69	6.17	3	17.68	11.01	4.5	2	5.67	16.52	4.17	2.67	8.17	6.01	3.17	25.36	2.67	6.51	2	14.68	4.17	7.84	13.51	7.51	7.51	5.5	1.84	16.85	5.17	2.34	7.84	1.67	2.84	20.02	22.36	27.69
Non- periphery	126.46	115.12	151.99	130.46	195.36	214.05	79.75	127.13	144.98	134.63	96.1	66.9	144.31	183.68	101.27	139.31	139.47	155.49	110.78	201.2	121.96	113.61	56.22	178.18	109.28	100.93	81.92	84.75	142.64	82.92	77.41	190.69	113.78	66.07	139.97	23.86	54.39	114.78	156.99	185.85
Periphery	173.51	184.85	147.98	169.5	104.6	85.92	220.22	172.84	154.99	165.33	203.87	233.07	155.66	116.28	198.7	160.66	160.49	144.48	189.19	98.77	178.01	186.35	243.74	121.79	190.69	199.03	218.05	215.22	157.32	217.05	222.56	109.28	186.19	233.9	159.99	276.11	245.58	185.19	142.98	114.11

## Sheet: Fig.1K
	WT	WT	WT	WT	WT	WT	WT	WT	WT	WT	WT	WT	WT	WT	WT	WT	WT	WT	WT	WT	Arid1b Het	Arid1b Het	Arid1b Het	Arid1b Het	Arid1b Het	Arid1b Het	Arid1b Het	Arid1b Het	Arid1b Het	Arid1b Het	Arid1b Het	Arid1b Het	Arid1b Het	Arid1b Het	Arid1b Het	Arid1b Het	Arid1b Het	Arid1b Het	Arid1b Het	Arid1b Het
Center	53.89	34.53	61.39	57.39	57.06	72.91	63.56	51.88	51.05	51.38	64.73	46.05	74.41	78.91	45.71	69.57	36.04	42.54	46.05	48.55	58.73	80.91	35.87	57.72	44.54	79.75	70.74	61.06	27.69	5.17	26.19	21.86	79.08	30.7	14.01	23.86	29.03	26.86	40.87
Open Arms	22.19	38.37	57.22	41.37	47.71	30.36	51.22	42.38	27.36	43.38	34.03	4.17	27.86	96.6	69.23	12.01	14.68	14.51	32.03	79.41	22.86	34.03	18.68	50.05	32.7	13.68	22.86	37.54	1.84	1.67	3	2	6.01	7.34	2.5	1.17	3.5	27.53	3.84
Closed Arms	223.89	227.06	181.35	201.2	195.19	196.7	185.19	205.71	221.55	205.21	201.2	249.75	197.7	124.46	185.02	218.38	249.25	242.91	221.89	172.01	218.38	185.02	245.41	192.19	222.72	206.54	206.37	201.37	270.44	293.13	270.77	276.11	214.88	261.93	283.45	274.94	267.43	245.58	255.26

## Sheet: Fig.1L
WT	Arid1b Het
104.57	74.18
180.04	148.53
168.81	22.82
166.9	103.4
159.84	82.92
165.4	142.87
139.21	145.62
178.25	90.57
90.51	143.77
167.24	29.16
87.53	123.12
42.02	82.08
113.09	135.48
83.03	120.78
168.38	105.52
148.11	2.15
59.72	25.4
36.26	72.86
50.77	73.92
126.38	71.36
