# Supplementary material for: Arid1b haploinsufficient mice reveal neuropsychiatric phenotypes and reversible causes of growth impairment
Source: eLife. 2017 Jul 11;6:e25730. doi: 10.7554/eLife.25730 (PMC5515576; doi:10.7554/eLife.25730)
Supplement: Figure 2—figure supplement 1—source data 1. — DOI: http://dx.doi.org/10.7554/eLife.25730.012 [file elife-25730-fig2-figsupp1-data1.xlsx]

## Sheet: Sheet1
wild type (um)	arid1b +/- (um)	arid1b -/- (um)
405.104	357.568	238.369
416.615	376.076	303.688
449.867	431.839	367.867
	406.942
