# Supplementary material for: Arid1b haploinsufficient mice reveal neuropsychiatric phenotypes and reversible causes of growth impairment
Source: eLife. 2017 Jul 11;6:e25730. doi: 10.7554/eLife.25730 (PMC5515576; doi:10.7554/eLife.25730)
Supplement: Figure 2—source data 1. — DOI: http://dx.doi.org/10.7554/eLife.25730.010 [file elife-25730-fig2-data1.xlsx]

## Sheet: Fig.2A
WT	Arid1b+/-
92.6706	85.1727
88.7953	91.8281
103.033	96.4617
108.677	90.6487
94.3555	81.9714
107.919	84.7515
105.139	77.0008
99.4103

## Sheet: Fig.2B
WT	HET
N=7	N=7
1420000000	1260000000
1650000000	1350000000
1490000000	1300000000
1500000000	1300000000
1590000000	1210000000
1510000000	1470000000
1500000000	1480000000
1.07712e+009*

## Sheet: Fig.2D
WT N=8	HET N=7
17838	18774
23040	18180
21744	21834
23418	18324
23049	23316
22482	19170
24984	17145
20052

## Sheet: Fig.2E
		WT N=8	WT N=8	WT N=8	WT N=8	WT N=8	WT N=8	WT N=8	WT N=8	WT N=8	WT N=8	HET N=7	HET N=7	HET N=7	HET N=7	HET N=7	HET N=7	HET N=7	HET N=7	HET N=7	HET N=7
	-0.82	0	0	0	0	0	0	0	0			0	0	0	0	0	0	0
	-1.18	40	145	171	72	77	36	41	82			109	114	60	114	94	124	126
	-1.54	302	271	309	331	224	185	268	300			186	233	239	246	308	256	174
	-1.9	193	284	299	467	332	233	370	329			258	316	388	254	371	324	294
	-2.26	240	238	238	280	270	292	353	211			293	258	348	296	316	186	175
	-2.62	218	274	208	199	229	256	337	201			202	238	246	179	211	162	240
	-2.98	214	329	215	295	250	232	278	253			263	335	289	195	205	266	227
	-3.34	306	471	320	326	194	284	370	285			265	319	278	233	223	236	203
	-3.7	469	548	329	317	352	472	282	340			322	207	337	210	383	282	318
	-4.06			327	301	354	323	282	227			188	0	241	263	398	273	119
	-4.42					267	185	195							46	85	21	29
	-4.78	0	0	0	14	12	0	0	0			0	0	0	0	0	0	0

## Sheet: Fig.2G
WT N=6	HET N=4
17964	15057
17577	14562
17604	15111
16254	16020
15543
17964

## Sheet: Fig.2H
	Bregma	WT N=6	WT N=6	WT N=6	WT N=6	WT N=6	WT N=6	HET N=4	HET N=4	HET N=4	HET N=4	HET N=4	HET N=4
	-0.82	0	0	0	0	0	14		0	10	0	0
	-1.18	63	69	60	33	108	84		101	84	68	89
	-1.54	217	229	181	124	231	204		215	169	282	243
	-1.9	289	343	248	214	284	327		232	227	237	259
	-2.26	216	188	293	253	128	166		160	242	203	161
	-2.62	223	198	204	231	193	216		214	217	158	207
	-2.98	205	190	169	233	226	220		209	184	155	201
	-3.34	211	249	250	231	238	248		213	191	145	224
	-3.7	230	208	292	316	210	232		164	172	210	150
	-4.06	222	211	218	159	109	177		165	122	271	106
	-4.42	120	68	41	12	0	108		0	0	51	39
	-4.78	0	0	0	0	0	0		0	0	0	0
