# Supplementary material for: Arid1b haploinsufficient mice reveal neuropsychiatric phenotypes and reversible causes of growth impairment
Source: eLife. 2017 Jul 11;6:e25730. doi: 10.7554/eLife.25730 (PMC5515576; doi:10.7554/eLife.25730)
Supplement: Figure 4—figure supplement 1—source data 1. — DOI: http://dx.doi.org/10.7554/eLife.25730.017 [file elife-25730-fig4-figsupp1-data1.xlsx]

## Sheet: A
WT	Het	WT	Het	WT	Het	WT	Het
98.3469	108.796	102.247	90.0953	105.073	85.5978	103.793	89.9055
93.5337	100.602	112.666	90.102	100.273	82.5813	106.269	82.339
109.712	108.534		85.6826	112.486	88.3103	95.4882	78.6409
104.749	101.666	95.6911	82.6966	103.22	83.27	102.071	84.6361
100.679	100.826	93.3344	88.6544	95.9807	86.675	93.7058	89.6051
97.6244	99.7059	97.3964	89.088	98.7241	95.1518	106.559	85.0472
98.2073	97.4692	103.185	102.826	92.9417	84.3976	91.868	87.0655
96.6492	97.5924	100.121	85.589	95.5923	97.6114	103.791	88.2373
100.5	104.471	95.3583	91.7316	95.7088	84.9417	96.4544	85.6836
	106.849		97.6712		87.9852		95.5504

## Sheet: B
	Wild type(n=12)			Arid1b het(n=12)
Avg	9.36086	0.280042	12	9.95804	0.42956	12
Light	4.94972	0.244653	12	4.12018	0.799126	12
Dark	13.927	0.654501	12	15.9298	1.09601	12

## Sheet: C
	Wild type(n=12)			Arid1b het(n=12)
avg	7.41022	1.28757	12	7.69544	1.17328	12
light	4.04255	0.714918	12	3.21731	0.743321	12
dark	10.8635	2.01986	12	12.3427	1.84419	12
