# Supplementary material for: Arid1b haploinsufficient mice reveal neuropsychiatric phenotypes and reversible causes of growth impairment
Source: eLife. 2017 Jul 11;6:e25730. doi: 10.7554/eLife.25730 (PMC5515576; doi:10.7554/eLife.25730)
Supplement: Figure 4—source data 1. — DOI: http://dx.doi.org/10.7554/eLife.25730.015 [file elife-25730-fig4-data1.xlsx]

## Sheet: Fig.4A
	WT	WT	WT	WT	WT	WT	WT	WT	WT		Arid1b +/-	Arid1b +/-	Arid1b +/-	Arid1b +/-	Arid1b +/-	Arid1b +/-	Arid1b +/-	Arid1b +/-	Arid1b +/-	Arid1b +/-
28	68.57	71.7	63.94	68.98	69.34	69.14	70.38	72.6	68.22		55.38	65.85	66.77	64.32	65.87	65.8	60.74	66.41	65.03	66.13
35	75.9	75.55	70.76	74.22	74.21	75.02	77	79.05	78.02		69.2	69.78	69.43	69.95	70.21	70.95	70.69	72.99	71.9	70.18
42	79	78.66	72.64	76.21	77.2	78.2	78.85	80.85	79.68		70	74.64	73.12	73.91	72.4	74.49	71.62	74.39	74.91	74.07
49	82.57	79.91	74.8	79.15	79.4	80.13	79.83	81.48	81.67		72.62	76.96	74.02	76.35	74.3	75.88	76.05	78.38	76.18	75.74
56	84.75	83.68	75.44	79.5	81.16	80	84.97	85.82	83.5		73.89	76.14	78	76.32	77.64	79.54	76.97	77.02	78.15	76.61

## Sheet: Fig.4B
Females	WT	WT	WT	WT	WT	WT	WT	WT	WT	WT	WT	WT	WT	WT	WT	WT	WT	WT	WT	WT	Arid1b +/-	Arid1b +/-	Arid1b +/-	Arid1b +/-	Arid1b +/-	Arid1b +/-	Arid1b +/-	Arid1b +/-	Arid1b +/-	Arid1b +/-	Arid1b +/-	Arid1b +/-	Arid1b +/-	Arid1b +/-	Arid1b +/-	Arid1b +/-	Arid1b +/-	Arid1b +/-	Arid1b +/-	Arid1b +/-
22	8.6	6.3	10.1	10.4	10.8	10.2	10	10.6	10.1	9.4	8.7	9.2	8.4	9.4	8.4	9.9	9.2	7.3	6.3	7.4	7.5	6.5	6.5	6.7	7.5	6.5	6.5	6.7	5.3	5.9	7.3	4.5	7.5	7.5	3.9	6.7	7.8	7	7.3	8.67
25	10.8	7.8	12.9	13.9	13.7	13.1	12.8	12.7	12.6	11	10.7	11.6	10.7	10.4	10.9	12.7	11.5	9.5	8.3	10	9.1	7.4	8	8.6	9.1	7.4	8	8.6	7.1	7.5	9.4	5.6	8.9	9.5	4.6	8.5	9.8	8.8	9	10.87
28	12.4	9.4	14.9	16	15.9	15.1	14.5	13.6	14.3	13.3	12.9	13.5	12	10.7	11.8	13.9	12.5	10.8	10	11.2	11.6	10.1	10.2	10.2	11.6	10.1	10.2	10.2	8.8	9	11.4	7.5	9.5	10.6	6.2	10.6	10.7	10	10.1	11.68
35	16.1	14.2	16.2	17	17.6	17.2	16.8	15	17.4	15.8	15.1	15.7	14	13.6	14.5	16	15.6	14.1	14.7	15	14.8	13.1	13	13	14.8	13.1	13	13	12.9	12.3	13.9	12	12.9	13	9.9	14.1	13.2	13.4	13	14.37
42	15.8	15	15.7	18.4	17.8	18.1	17.6	15.2	17.1	16.7	15.9	15.8	14.6	15.2	15.1	16	15.6	15.5	14.6	15.3	15.8	14	13.7	14	15.8	14	13.7	14	14.6	13.2	14.4	14.2	14.6	13.8	12.7	13.7	13.4	13.5	13.8	14
Males	WT (n=14)	WT (n=14)	WT (n=14)	WT (n=14)	WT (n=14)	WT (n=14)	WT (n=14)	WT (n=14)	WT (n=14)	WT (n=14)	WT (n=14)	WT (n=14)	WT (n=14)	WT (n=14)	WT (n=14)	WT (n=14)	WT (n=14)	WT (n=14)	WT (n=14)	WT (n=14)	Het (n=14)	Het (n=14)	Het (n=14)	Het (n=14)	Het (n=14)	Het (n=14)	Het (n=14)	Het (n=14)	Het (n=14)	Het (n=14)	Het (n=14)	Het (n=14)	Het (n=14)	Het (n=14)	Het (n=14)	Het (n=14)	Het (n=14)	Het (n=14)	Het (n=14)	Het (n=14)
22	10	8.4	8.8	7.4	8.6	8.9	7.8	7.1	8	8.3	10.1	9.6	9.2	11.2							7.1	6.6	6	7.7	7.5	5.4	5.4	4.7	7.1	9.4	7.6	7.4	7.4	6.3
25	11.7	10	10	8.9	11.6	11.8	9.7	9.5	10.1	11	12.3	8	10.7	12.9							8.6	8	7.2	9.5	9	6.5	6.7	6.2	8.4	11	9.3	9.4	9	6.9
28	14.8	12.8	12.9	11.3	13.5	14.4	11.6	11.3	12.3	13.3	14.2	10.3	13.8	15.2							11.1	10	9.5	12	11.5	8.8	9	7.5	10.2	13	11.4	11	10.4	8.7
35	19.1	17.1	17.4	15.9	18.9	19.7	16.6	15.8	17.4	18.3	17.7	16.9	18.7	18.8							14.8	14	14	16.4	15.4	13.9	12.2	12.6	13	17.3	15.8	15	15	12.7
42	20.9	19.3	19.2	19.1	17.8	19.4	18.5	18.5	19.7	20	20.1	17.8	20.4	20.1							17	16.5	16.4	19.1	17.9	17.4	13.3	13.5	14.9	18.4	17.3	16.6	17.7	16.1

## Sheet: Fig.4C
WT	Arid1b+/-
290.3	198.8
230.3	181.1
125.5	93.8
256.1	99.8
258.2	200.7
264.4	135.5
133	90.1
110.9	74.8
147.6	76.1
120.3	80.7
124.2	94
128.6	100.5
135.7	134.2
244.6	186.3
287.4	170.9
303.6	224.9
	165.5
	109.2
	57.6

## Sheet: Fig.4D
	WT	WT	WT	WT	WT	Arid1b het	Arid1b het	Arid1b het	Arid1b het	Arid1b het
Arid1b	95.1839	109.62	103.39	84.5813	107.224	73.7391	63.1365	72.8405	68.0484	60.0216
Igf1	109.744	76.004	106.743	100.985	107.486	62.1638	51.0204	53.7429	64.5794	63.0316
Ghr	96.134	103.751	113.141	81.9672	105.564	100.913	90.0076	124.239	122.105	133.156
Igfbp3	89.7761	100.654	101.003	138.934	69.4672	203.412	243.581	283.707	227.269	254.807

## Sheet: Fig.4E
WT	Arid1b+/-
2.16701	2.66279
2.16701	2.66279
3.24924	2.01119
9.22876	11.149
9.18868	14.5845
2.11146	26.61966*
9.78859	3.14125
2.06694	4.27426
2.00003	2.98961
1.80958	2.37723
2.89184	9.61889
1.35542	1.57231
1.34394	3.70015
6.27616	0.614616
1.95534

## Sheet: Fig.4F
	WT	WT	WT	WT	WT	WT	WT	WT	WT	WT	Arid1b+/-	Arid1b+/-	Arid1b+/-	Arid1b+/-	Arid1b+/-	Arid1b+/-	Arid1b+/-	Arid1b+/-	Arid1b+/-	Arid1b+/-
Arid1b	1.082	1.181	1.045	0.838	0.988	0.905					0.444	0.544	0.679	0.438	0.69
GH primer#1	0.827	0.914	1.036	1.445	1.277	0.692					1.43	2.596	1.101	0.653	1.826
GH primer#2	0.857	0.842	1.037	1.281	1.251	0.834					1.397	2.376	1.172	0.671	1.819

## Sheet: Fig.4G
WT	Arid1b+/-
2.16701	2.66279
8.853	9.84495
3.82682	3.80701
3.82682	5.55504
3.30952	1.9666
6.65669	8.44191
13.4458	9.55959
5.97453	4.15302
3.27953	4.78231

## Sheet: Fig.4H
	WT	WT	WT	WT	WT	WT	WT	WT	WT	WT	WT	WT	WT	WT	WT	WT	WT	WT	WT	WT	Arid1b+/-	Arid1b+/-	Arid1b+/-	Arid1b+/-	Arid1b+/-	Arid1b+/-	Arid1b+/-	Arid1b+/-	Arid1b+/-	Arid1b+/-	Arid1b+/-	Arid1b+/-	Arid1b+/-	Arid1b+/-	Arid1b+/-	Arid1b+/-	Arid1b+/-	Arid1b+/-	Arid1b+/-	Arid1b+/-
0 min	1.35463	0.929156	4.4455	1.08434	5.5341		8.80817	5.72152	8.99509	21.9341	11.0704	16.9611	6.05871	5.70278	7.89218	17.5074	12.2494	14.6863	10.0793		0.0966929	1.81509	0.299591	1.08434	7.76131	8.63994	8.11652	20.4168	8.62125	1.85332	10.0045	7.29381	5.23409	12.2868		3.27742	5.72152	10.4346	9.44371	15.8322
5 min	49.7057	14.4047	32.7857	18.2617	69.0443	22.143	42.24	30.0729	34.5776	19.6597											73.0285	9.51848	17.2059	10.8086	55.3173	21.0042	28.6842	33.8171	37.6531	41.0885	41.1479
15 min	38.2828	12.8861	34.8705	20.7389	72.40454*	33.7586	42.0412	29.513	24.6382	18.7148											40.1972	3.63602	18.4505	4.10696	75.55652*	7.55563	19.017	14.2359	25.307	28.5879	32.7857

## Sheet: Fig.4I
	WT	WT	WT	WT	WT	WT	WT	WT	WT	WT	Arid1b+/-	Arid1b+/-	Arid1b+/-	Arid1b+/-	Arid1b+/-	Arid1b+/-	Arid1b+/-	Arid1b+/-	Arid1b+/-	Arid1b+/-
Arid1b	1.171	0.969	0.917	1.102	0.916	1.09	0.947	0.922			0.825	0.622	0.722	0.673	0.662	0.468	0.568
GHRH	0.896	0.84	1.354	0.455	0.918	1.373	1.513	1.13			0.069	0.841	0.096	1.332	1.092	0.827	0.098

## Sheet: Fig. 4J
	Arid1b +/fl: Albumin-Cre (-)	Arid1b +/fl: Albumin-Cre (-)	Arid1b +/fl: Albumin-Cre (-)	Arid1b +/fl: Albumin-Cre (-)	Arid1b +/fl: Albumin-Cre (-)	Arid1b +/fl: Albumin-Cre (-)	Arid1b +/fl: Albumin-Cre (-)	Arid1b +/fl: Albumin-Cre (-)	Arid1b +/fl: Albumin-Cre (-)	Arid1b +/fl: Albumin-Cre (-)	Arid1b +/fl: Albumin-Cre (-)	Arid1b +/fl: Albumin-Cre (-)	Arid1b +/fl: Albumin-Cre (-)	Arid1b +/fl: Albumin-Cre (-)	Arid1b +/fl: Albumin-Cre (-)	Arid1b +/fl: Albumin-Cre (-)	Arid1b +/fl: Albumin-Cre (-)	Arid1b +/fl: Albumin-Cre (-)	Arid1b +/fl: Albumin-Cre (-)	Arid1b +/fl: Albumin-Cre (-)	Arid1b +/fl: Albumin-Cre (+)	Arid1b +/fl: Albumin-Cre (+)	Arid1b +/fl: Albumin-Cre (+)	Arid1b +/fl: Albumin-Cre (+)	Arid1b +/fl: Albumin-Cre (+)	Arid1b +/fl: Albumin-Cre (+)	Arid1b +/fl: Albumin-Cre (+)	Arid1b +/fl: Albumin-Cre (+)	Arid1b +/fl: Albumin-Cre (+)	Arid1b +/fl: Albumin-Cre (+)	Arid1b +/fl: Albumin-Cre (+)	Arid1b +/fl: Albumin-Cre (+)	Arid1b +/fl: Albumin-Cre (+)	Arid1b +/fl: Albumin-Cre (+)	Arid1b +/fl: Albumin-Cre (+)	Arid1b +/fl: Albumin-Cre (+)	Arid1b +/fl: Albumin-Cre (+)	Arid1b +/fl: Albumin-Cre (+)	Arid1b +/fl: Albumin-Cre (+)	Arid1b +/fl: Albumin-Cre (+)
8	3.4	3	3.6	3.3	3.7	4.1	3.8	3.9	4												3.1	3.2	4.1	3.7	3.8	4	3.3	4.3	4.4	3.9	4.2	3.7	4.2	4.5
11	4.6	4.2	4.4	4.3	4.6	5.4	5	5	5.3												3.9	3.6	5.2	4.7	4.7	4.9	4.2	5.9	5.8	5.2	5.6	4.9	5.5	5.6
15	6.1	5.5	5.7	5.5	5.6	6.8	5.8	5.8	7												5.1	4.7	6.6	5.8	5.8	6.1	5.5	7.2	7.3	6.5	7	6.7	6.8	7
18	6.4	6.1	6.2	6.2	6	7	6.1	6.2	7												5.5	5.3	7.1	6.1	6.3	6.2	6.1	7.7	7.8	6.6	7.3	6.8	7	7.4
22	7	6.5	7.3	8.9	6.9	9.3	7.5	7.7	9												5.8	5.7	7.9	7	8.1	8.2	6.9	9.6	9.6	7.8	9.4	8.6	9.1	9.5

[truncated: 4 more sheets: Fig.4K, Fig.4L, Fig.4M, Fig.4N]
