# Supplementary material for: Arid1b haploinsufficient mice reveal neuropsychiatric phenotypes and reversible causes of growth impairment
Source: eLife. 2017 Jul 11;6:e25730. doi: 10.7554/eLife.25730 (PMC5515576; doi:10.7554/eLife.25730)
Supplement: Figure 5—source data 1. — DOI: http://dx.doi.org/10.7554/eLife.25730.019 [file elife-25730-fig5-data1.xlsx]

## Sheet: Fig.5A
	Saline	Saline	Saline	Saline	Saline	Saline	Saline	Saline	Saline	Saline	Saline	Saline	Saline	Saline	Saline	Saline	Saline	Saline	Saline	Saline	IGF1	IGF1	IGF1	IGF1	IGF1	IGF1	IGF1	IGF1	IGF1	IGF1	IGF1	IGF1	IGF1	IGF1	IGF1	IGF1	IGF1	IGF1	IGF1	IGF1
WT	19.9	17.2		22.1	21.7	21	21	21	22	20.3	22.6	22.6									20.8	25	22.2		19.7	21.8	20	21.9	22.5	22.5	21.4	22.7	21.8
Arid1b Het	18.6		18.2	18.1	20.1	18.4	19.9	19	20.4	17.4	18.9	18.3									14.8	20	17.6	17	17.9	17.2	18.8	16.8	20	19.7	19.5	17.7	17.1

## Sheet: Fig.5B
	Saline	Saline	Saline	Saline	Saline	Saline	Saline	Saline	Saline	Saline	Saline	Saline	Saline	Saline	Saline	Saline	Saline	Saline	Saline	Saline	Saline	Saline	Saline	Saline	Saline	Saline	Saline	Saline	Saline	Saline	IGF1	IGF1	IGF1	IGF1	IGF1	IGF1	IGF1	IGF1	IGF1	IGF1	IGF1	IGF1	IGF1	IGF1	IGF1	IGF1	IGF1	IGF1	IGF1
WT	171	107.61	190.19	223.72	213.88	171.84	156.99	117.62	159.99	200.2	170.34	190.36	207.71	195.69	240.07	230.9	155.32	221.22	255.59	250.42	210.04	209.21	200.37	226.56	203.37	231.23	223.22				224.72	197.86	172.67	227.06	228.4	176.01	200.87	204.04	196.7	140.64	192.19	196.36	264.76	124.96	163.5	221.89	164.33	201.87	158.66
Arid1b+/-	285.29	257.26	177.01	235.24	282.12	273.11	244.08	236.4	258.43	231.4	279.95	252.75	176.68	174.17	256.76	254.25	249.42	187.02	275.78	193.86	252.59										228.06	282.12	254.59	289.62	276.28	222.22	217.22	265.26	256.26	268.27	264.26	252.09	205.37	219.72	268.94	266.27	248.58	268.94	244.41
[truncated: 41 more columns]

## Sheet: Fig.5D
	Saline	Saline	Saline	Saline	Saline	Saline	Saline	Saline	Saline	Saline	Saline	Saline	Saline	Saline	Saline	Saline	Saline	Saline	Saline	Saline	GH	GH	GH	GH	GH	GH	GH	GH	GH	GH	GH	GH	GH	GH	GH	GH	GH	GH	GH	GH
WT	22.2	21.1	23.7	20.2	23	21.6	22.4	22.4	21.3	21.9	20.4	18.8	19.4	23.9	24.39	22.06	22.5	22.79	20.74	20.9	23.6	21.8	21.5	22.1	22.6	23.4	21.4	24.1	21.3	20.5	21.2	20.6	24.14	24.86	22.39	23.13	23.6	23.85	25.62
Arid1b+/-		18.8		17.6	18.1	17.9	17.4	17.4	18.5	16	18.74	18.26	19.13	19.96	19.58	19.94					21.1	19.8	20.7	19	20.6	20.7	20		20.6	18.9	21.43	21.32	20.33	23.78	21.76	21.7

## Sheet: Fig.5E
	Saline	Saline	Saline	Saline	Saline	Saline	Saline	GH	GH	GH	GH	GH	GH	GH
WT	85.64	90.46	81.92	85.8	87.79	84.78	87.01	89.51	88.18	89.77	85.26	88.95	86.34	88.75
Arid1b+/-	81.56	78.88	80.86	79.13	80.31	81.16		86.85	81.4	83.96	83.31	84.13	86.78

## Sheet: Fig.5F
	Saline	Saline	Saline	Saline	Saline	Saline	Saline	Saline	Saline	GH	GH	GH	GH	GH	GH	GH	GH	GH
WT	100.6	123.8	106.2	93.8	124.8	112.6	109	120.2	97.8	106	112.4	116.4	113.6	130.2	125.4	110.2	125.6	120.8
Arid1b+/-	110.8	101.4	107.2	112.2	103	77.8	84.4	69	93.8	105.4	93.4	119.6	105.4	118.4	126.4	114.4	97.4	100.6

## Sheet: Fig.5G
	Saline	Saline	Saline	Saline	Saline	Saline	Saline	Saline	Saline	GH	GH	GH	GH	GH	GH	GH	GH	GH
WT	93	91.6	100	84.8	58.8	107.2	96	80.4	80.2	99.6	100	118.4	102.8	102.4	91	100.2	82.8	98.2
Arid1b+/-	84.8	72.5	48.8	51.6	55.8	62.8	57	93.4	72.4	63.6	79.2	98.8	76.6	101.4	102.4	103.4	92.8	78.6

## Sheet: Fig.5H
	Saline	Saline	Saline	Saline	Saline	Saline	Saline	Saline	Saline	Saline	Saline	Saline	Saline	Saline	Saline	Saline	Saline	Saline	Saline	Saline	Saline	Saline	Saline	Saline	Saline	Saline	Saline	Saline	Saline	Saline	GH	GH	GH	GH	GH	GH	GH	GH	GH	GH	GH	GH	GH	GH	GH	GH	GH	GH	GH
WT	156.99	198.37	233.9	164.33	174.17	116.12	205.71	214.38	251.42	237.24	258.26	229.23	214.05	256.59	229.23	206.37	156.82	209.04	228.4												227.56	182.85	198.7	222.56	171	221.22	169.34	208.38	269.6	89.42	193.19	254.09	126.63	220.55	245.41	221.39	241.07	226.56	205.87
Arid1b+/-	219.39	260.26	250.08	234.9	202.87	260.26	254.75	267.93	205.21	269.6	271.77	262.1	174.51	291.96	240.91	251.92															199.2	193.86	256.59	227.39	278.78	194.03	147.48	283.78	294.79	266.93	298.3	254.75	274.94	273.77	230.06	197.7
[truncated: 41 more columns]
