# Supplementary figures and images for: Arid1b haploinsufficient mice reveal neuropsychiatric phenotypes and reversible causes of growth impairment
Source: eLife journal article supplement (doi:10.7554/elife.25730), 2017-07-10

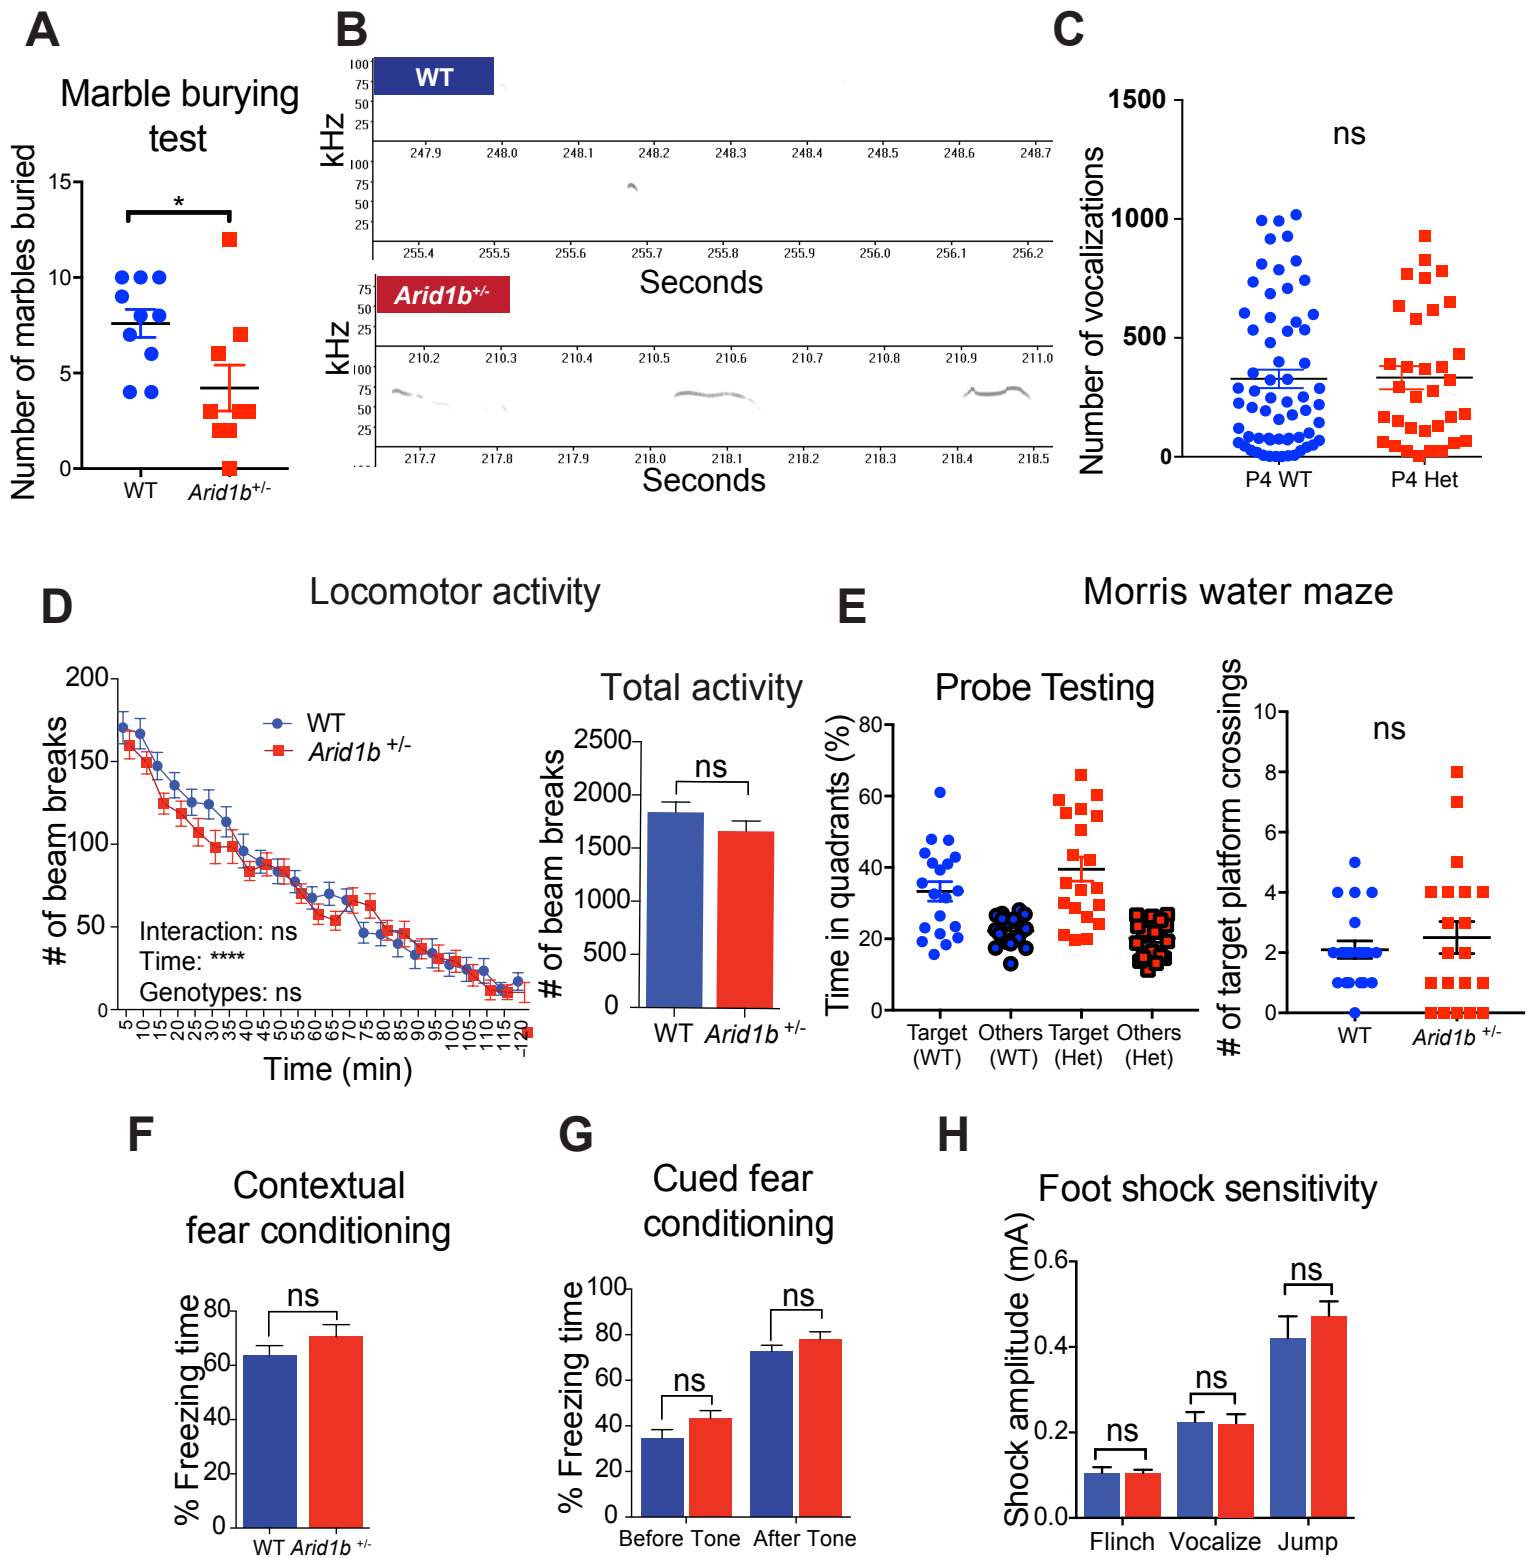

Figure 1-figure supplement 2

Supplement: supp [file elife-25730-supp-v2.zip]

Perinatal mice

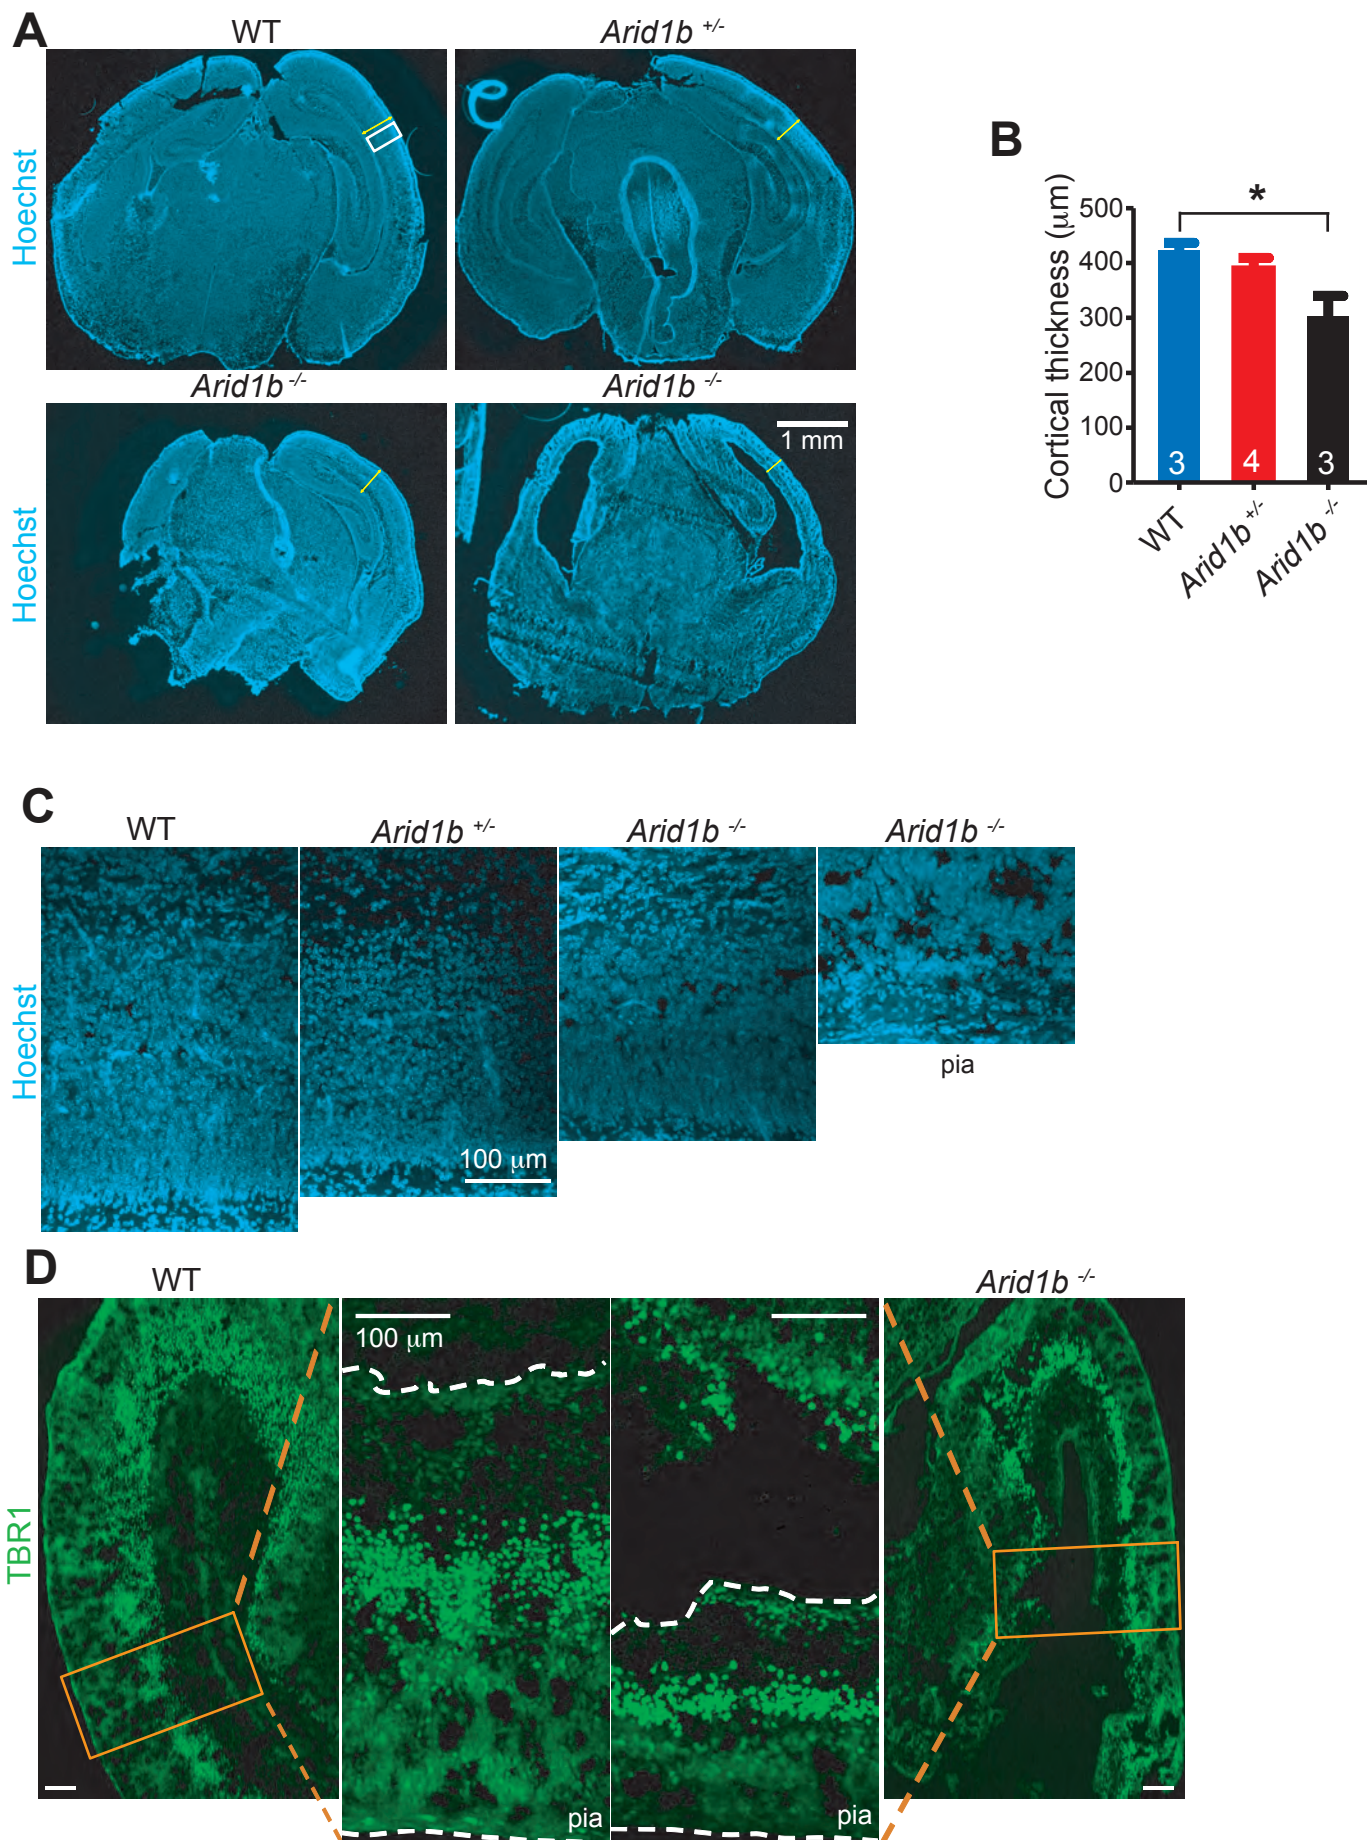

Figure 2-figure supplement 1

Supplement: supp [file elife-25730-supp-v2.zip]

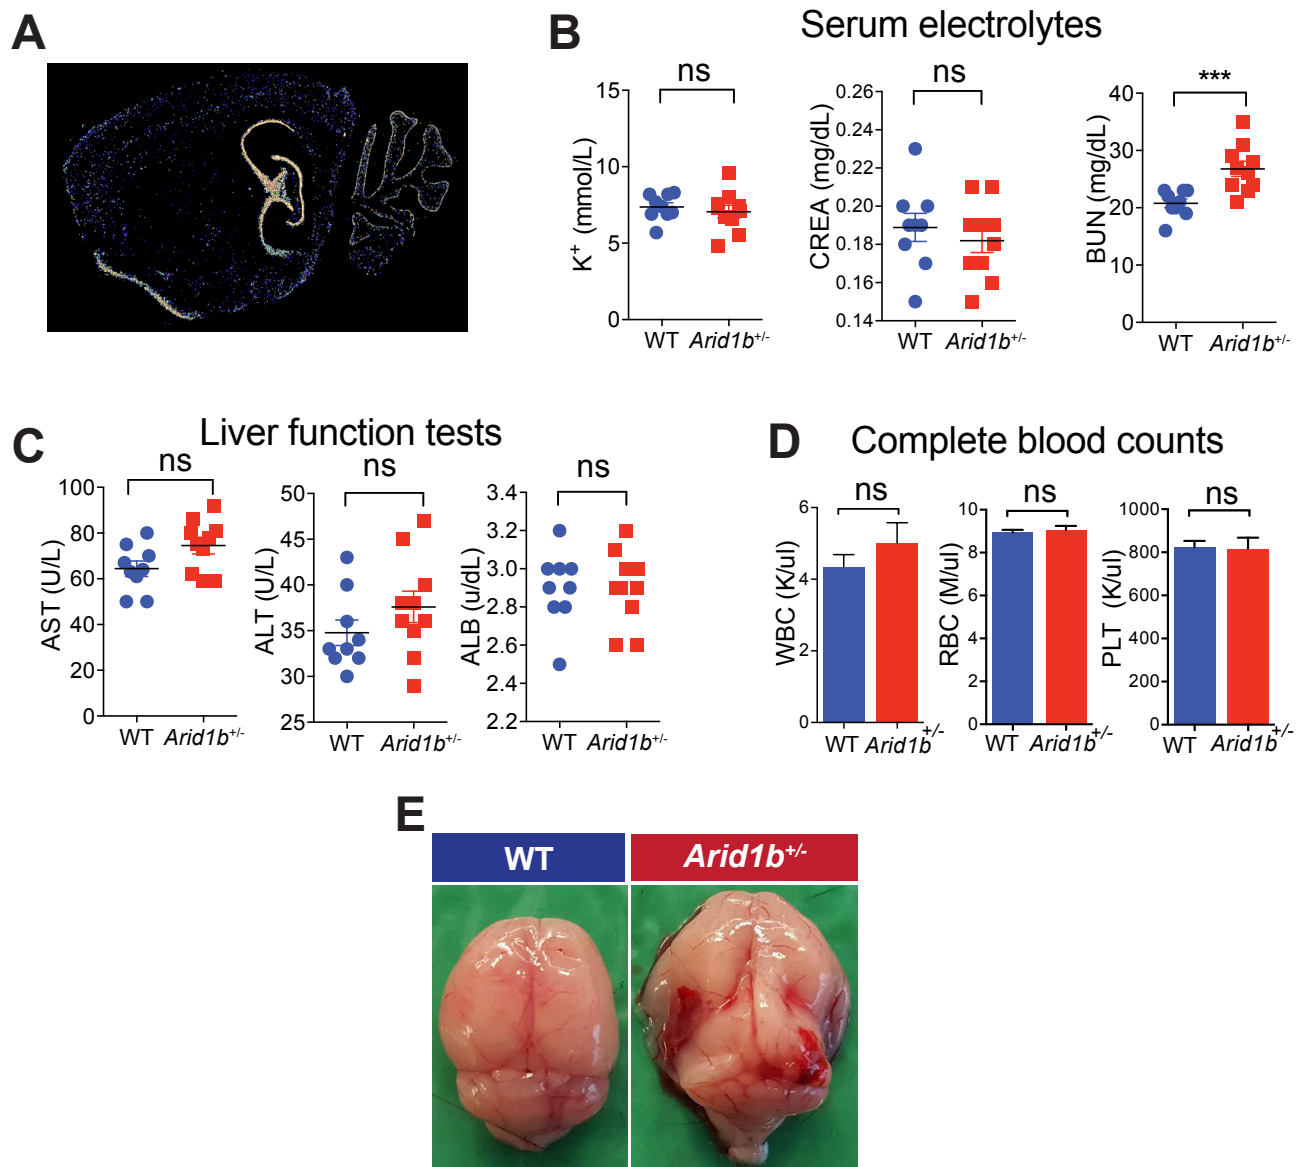

Figure 1-figure supplement 1

Supplement: supp [file elife-25730-supp-v2.zip]

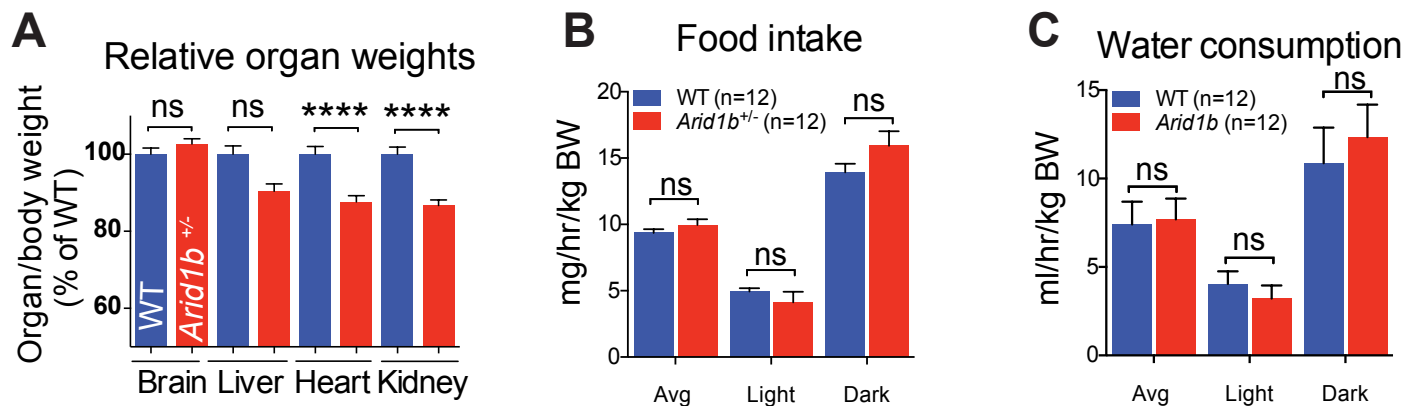

**Figure 4-figure supplement 1**

Supplement: supp [file elife-25730-supp-v2.zip]

**A**

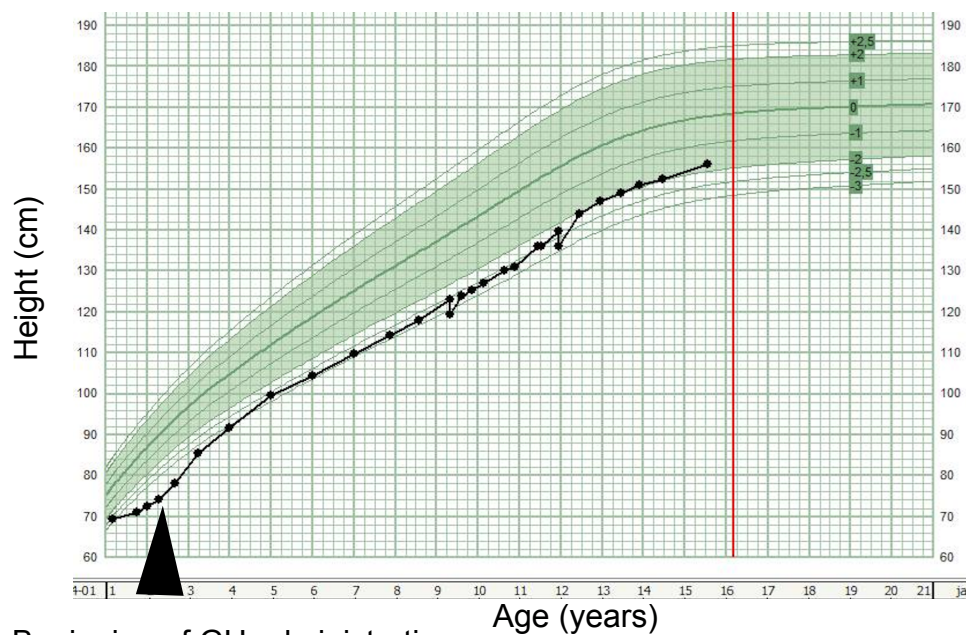

**B**

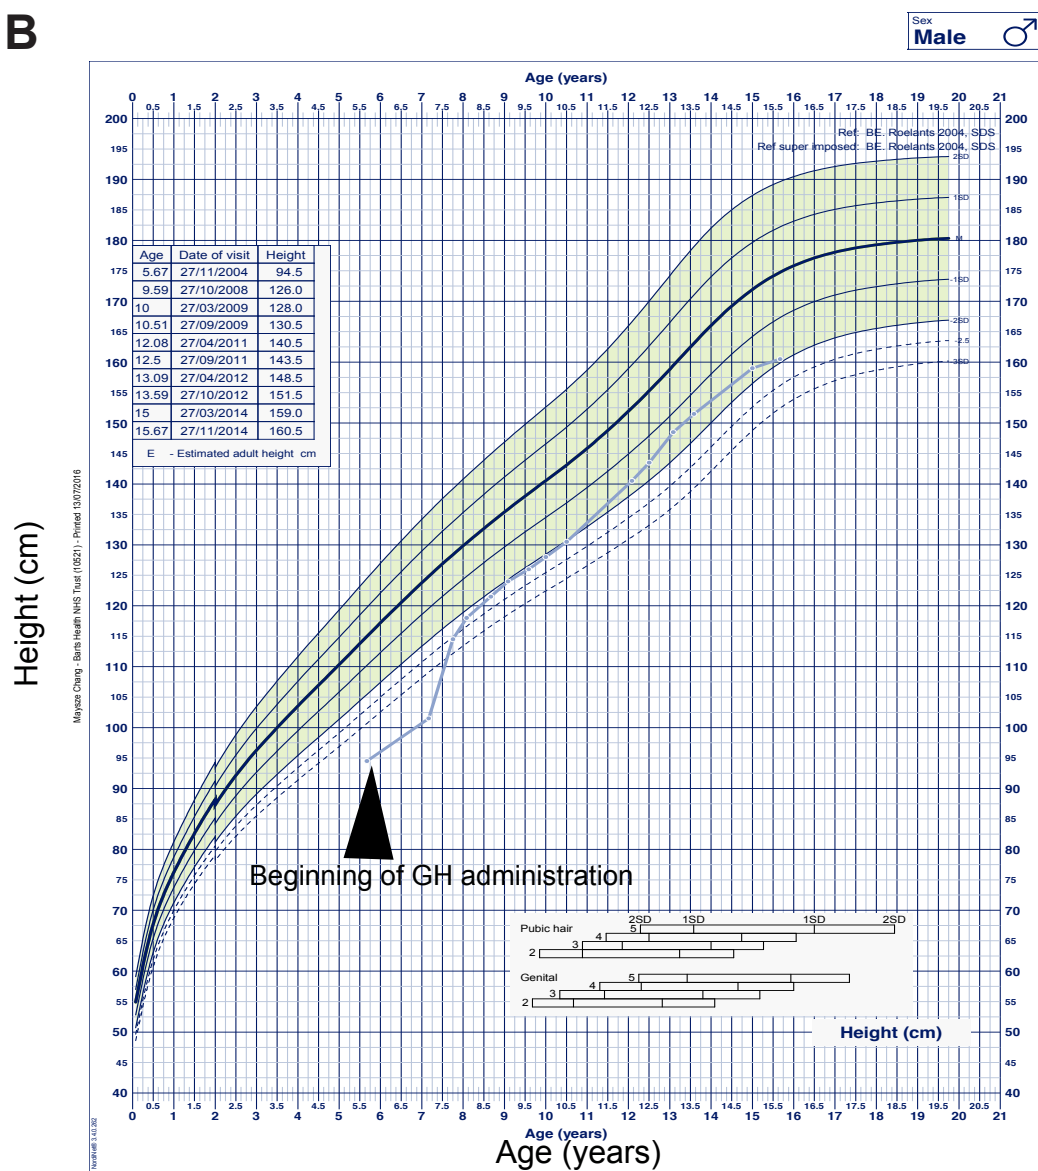

**Figure 5-figure supplement 1**

Supplement: supp [file elife-25730-supp-v2.zip]
